# Supplementary material for: Urban geochemistry and human-impacted imprint of dissolved trace and rare earth elements in a high-tech industrial city, Suzhou
Source: Oxford University Press journal article supplement (doi:10.1525/elementa.2020.00151), 2021-01-01
Supplement: table_s1.xlsx [file table_s1.xlsx]

## Sheet: Sheet1
Concentrations of dissolved trace elements, pH, and electric conductivity in Suzhou surface water.
Sample	Population density	pH	EC	Cd	Pb	Co	Sn	Cu	Ni	V	As	Mo	Sb	Al	Li	Fe	Zn	Sr
WC-1	HPD	7.98	409	0.0198411	0.012128	0.0412161	0.0391094	1.6194	2.18373	2.91139	3.90737	4.3871	5.23554	5.52389	4.27611	8.30899	59.175	192.038
WC-2	HPD	7.8	418	0.0103708	0.00246328	0.0320504	0.0616817	1.32233	2.35695	1.51294	3.69895	4.18681	3.8905	0.974939	4.30083	8.27191	17.9186	189.412
WC-3	HPD	7.95	414	0.0152493	0.0198714	0.032769	0.0337131	1.19362	2.22165	1.77701	4.10102	4.54318	6.20815	1.31644	4.37459	9.63524	16.5907	195.889
WC-4	HPD	7.93	428	0.0135451	0.0115685	0.0373748	0.0462503	1.17518	2.322	3.02195	4.03073	4.67141	4.8437	2.03505	4.71546	9.01681	6.66745	206.041
WC-5	HPD	7.73	467	0.0223975	0.0110822	0.0519374	0.0451019	1.12442	2.78302	3.51969	4.03424	4.62439	6.24139	3.24559	5.4194	11.1093	11.2953	211.469
WC-6	LPD	7.62	555	0.0228479	0.0327946	0.0862735	0.0884424	1.97139	3.34393	3.28895	2.8336	4.61566	3.39787	3.99899	9.49398	13.1748	25.0191	248.608
WS-1	LPD	7.16	362	0.010828	0.0278111	0.0314157	0.0180851	0.447163	0.753571	0.149972	1.91151	2.99255	3.4841	1.79637	2.9467	8.50248	5.87743	171.53
WS-2	LPD	7.78	560	0.0162739	0.0216608	0.105089	0.0714437	0.829229	2.33732	3.12588	3.13614	4.69813	2.25547	1.297	8.73823	12.9171	9.11287	259.266
WS-3	MPD	7.7	566	0.0184103	0.0395253	0.110232	0.0496026	1.16403	2.87096	3.14388	3.35783	4.58317	7.80877	2.17789	8.45679	12.3972	3.59488	233.23
WS-4	LPD	7.76	587	0.0141319	0.10445	0.10408	0.0658808	1.28971	3.48266	3.48983	3.09744	5.66671	4.17624	1.98332	8.74151	12.6153	5.30294	242.911
WS-5	LPD	7.66	611	0.020738	0.0237197	0.0836435	0.067308	0.666964	3.55991	3.53408	3.25718	5.07775	8.78457	2.56788	9.42047	13.9233	3.37518	255.365
WS-6	LPD	7.59	576	0.0203324	0.019153	0.0972073	0.0734574	0.843957	3.42317	3.4773	2.97641	5.1687	5.30901	2.28795	9.27142	13.7209	5.82851	255.762
WS-7	LPD	7.67	720	0.018144	0.0252947	0.117018	0.0702829	1.03829	6.22433	3.99858	3.18976	6.01623	4.15214	2.7393	10.2228	14.0767	5.40545	259.274
JH-1	HPD	7.48	539	0.0231619	0.0897088	0.0788524	0.0699933	1.21275	3.65586	3.81784	4.0439	5.26439	6.04783	7.96624	8.11302	11.9773	4.92437	239.674
JH-2	MPD	6.67	575	0.0315789	0.0192013	0.139907	0.0905168	1.28955	6.77594	0.465457	0.790489	4.33776	3.4874	2.42253	8.74451	13.9468	14.7514	239.856
JH-3	MPD	7.13	677	0.0218143	0.0414841	0.238394	0.0804303	1.6076	4.89094	1.80577	1.21228	4.92714	3.1055	4.05653	8.99371	14.4276	8.6638	251.74
JH-4	MPD	7.1	598	0.0230771	0.0275673	0.15022	0.0889611	1.31659	5.71307	1.36599	1.34622	4.1448	3.68452	2.11192	8.36581	14.7791	9.45387	248.911
JH-5	MPD	8.12	631	0.0230139	0.0254822	0.127891	0.107207	1.39319	4.98788	2.02905	1.70034	5.22446	4.51225	2.82086	8.95063	14.8628	9.14381	247.175
JH-6	HPD	7.49	549	0.0147228	0.0170595	0.0774796	0.0775128	1.79901	3.43119	2.63669	2.69285	4.63406	3.60546	3.51701	7.29035	11.3813	5.69235	230.568
JH-7	MPD	7.41	541	0.0253243	0.0136514	0.0791045	0.102477	1.40112	3.45023	3.06828	2.26959	5.42023	3.99981	2.23133	7.21691	11.5838	148.996	229.143
SH	LPD	8.1	452	0.0107315	0.00998413	0.0442446	0.058664	0.893942	1.2318	1.40811	3.02089	5.50418	2.40144	4.44227	4.61854	10.3166	8.44824	212.541
JJH	LPD	9.1	400	0.00897257	0.146968	0.0497664	0.0521527	1.61646	2.4906	2.98033	5.41953	4.35641	4.61299	4.99096	5.24899	8.40458	7.65276	189.222
DSH	LPD	7.81	514	0.0088177	0.0187413	0.0531086	0.0613887	0.696666	2.41537	2.08463	6.79658	4.81654	3.62967	1.6422	5.82961	13.0673	6.45842	219.89
CH-1	LPD	8.28	563	0.00960563	0.0270723	0.0533663	0.0416173	2.17535	2.84732	2.95378	4.17804	4.36492	3.83394	2.58637	5.66234	10.5386	8.46754	216.354
CH-2	LPD	8.81	513	0.00854581	0.0176854	0.0373044	0.0331358	1.31798	1.94401	2.26726	4.27433	3.01972	5.08492	0.937371	5.64184	9.75422	3.24945	195.894
YCH-1	LPD	7.43	525	0.0108388	0.0270495	0.0969442	0.0559179	1.47652	2.48615	2.37154	3.41551	5.31531	4.02275	2.96575	7.05168	12.4837	3.14797	225.91
YCH-2	MPD	7.63	371	0.0152847	0.296282	0.089138	0.0789922	1.77862	2.81499	4.84023	5.14818	5.1625	4.49658	1.95077	6.7427	10.9379	6.03014	218.199
THC	LPD	8.29	420	0.0128426	0.00288034	0.0430282	0.0481377	1.30315	1.61084	1.82847	4.8466	4.90317	3.26071	5.51686	3.65949	8.54394	3.88648	193.382
YYS	LPD	7.86	400	0.00551078	0.00127035	0.0331123	0.037652	0.747411	0.859075	0.489505	2.47817	3.81515	2.66377	1.49716	3.14789	10.0194	3.01782	182.726
JSW	LPD	8.97	459	0.0228515	0.0892448	0.0471498	0.0432131	0.709553	1.4452	0.577556	2.43253	3.63209	2.27989	3.28714	3.97009	11.5376	8.52691	190.218
