# Supplementary material for: Urban geochemistry and human-impacted imprint of dissolved trace and rare earth elements in a high-tech industrial city, Suzhou
Source: Oxford University Press journal article supplement (doi:10.1525/elementa.2020.00151), 2021-01-01
Supplement: table_s2.xlsx [file table_s2.xlsx]

## Sheet: Sheet1
Dissolved trace element concentrations (μg/L) in other rivers.
River	V	Fe	Co	Ni	Zn	As	Mo	Sb	Pb	Sn	Cu	Al	Li	Sr	Cd	reference
This study	2.77	11.56	0.08	2.8	7.16	3.22	4.65	4.01	0.02	0.06	1.29	2.5	6.9	222.9	0.02
World average	0.71	66	0.148	0.801	0.6	0.62	0.42	0.07	0.019		1.48	32	1.84	60	0.08	Gaillardet et al., 2003
Xiangjiang River, China					84.57	12.24			2.29		20.33				1.34	Zeng et al., 2015
Dan River, China	4.87	2.71	0.15	1.68	7.83	7.26		27.82			0.12	2.96			0.7	Meng et al., 2016
Tarim River, China	1.06	61.85	0.1	1.79	7.11	3.07		0.45	0.45	0.08	1.22	84.3	65.43	1731	0.02	Xiao et al., 2014
Zhujiang River, China	2.66		0.12	4.43			1.89		0.06		8.24				0.06	Zeng et al., 2018
Haraz River, Iran				22.4	52.75	55.35			4.4		13.25				2.65	Nasrabadi, 2015
Benue River, Nigeria		751			78.7				207		56				0.052	Eneji et al., 2012
Tigris River, Turkey		388	111	72	37	2.354			0.342		165				1.368	Varol and Şen, 2012
Seine at Paris, France	2.85	302	0.18	5.06	4.98	2.71		227	0.22		3.53	16			0.06	Gaillardet et al., 2003
Seine River, France						0.75	0.97		353.6		2.23			0.54	31	Elbaz-Poulichet et al., 2006
Hawkesbury-Nepean River, Australia		268	0.24	0.26	0.88				0.111		0.81				0.045	Markich and Brown, 1998
Indin River, Canada	0.009	50	0.0158	0.64	1.52	0.35		0.005			0.841		0.91	10.5		Gaillardet et al., 2003
Amazon	0.703	0.0104	0.1766	0.74	0.45	0.14	0.175	0.061	0.064		0.1463	9.4	0.91	25.8	0.1781	Gaillardet et al., 2003
Trinity River, USA	2.05	5.81	0.163	2.07					26.11		1.15	4.81			0.00798	Warnken and Santschi, 2009
